# Supplementary material
Source: publisher figshare collection journal article supplement (https://sage.figshare.com/ndownloader/files/17302265)
Supplement: Supplementary file 1 [file 17302265]

## Appendix A

Table 1: Coding of waste management influence factors

|                            |       |                                                                                                                                      |
|----------------------------|-------|--------------------------------------------------------------------------------------------------------------------------------------|
| <i>Construction Method</i> | CMT1  | Wastes are to be placed in an accessible area for easy shipping                                                                      |
|                            | CMT2  | An index score to define the capability of a firm towards waste management is mandatory                                              |
|                            | CMT3  | During bidding process additional weightage to be given to contractors having clear plan, schedule and estimates of waste management |
|                            | CMT4  | An ranking system to rank firm according to existing plans of towards waste management is mandatory                                  |
|                            | CMT5  | Mandatory item of actual cost for waste treatment to be provided in bill along with satisfactory documentation                       |
|                            | CMT6  | Workers should be given training in identifying recyclable material                                                                  |
|                            | CMT7  | Enforce strict punishment for illegal disposal of wastes in violation of EPA                                                         |
|                            | CMT8  | Waste collectors are to be installed at every floor and a jumbo collector for the                                                    |
|                            | CMT9  | Site waste management plan (SWMP) should be completed before preconstruction                                                         |
|                            | CMT10 | Fragile materials are to be handled carefully in order to reduce wastage during                                                      |
|                            | CMT11 | Individual waste from a mixture of wastes should be made a must do option in                                                         |
| <i>Documentation</i>       | DOC1  | A Statute on management of waste by the corresponding waste producers is not                                                         |
|                            | DOC2  | Clauses relevant to Quality and safety of recycled material are not necessary to be                                                  |
|                            | DOC3  | Clauses in contract documents specifying waste treatment methodologies and                                                           |
|                            | DOC4  | Checklists for waste management need to be verified and enforced by subcontractor                                                    |
|                            | DOC5  | Code provisions for construction waste management is not mandatory                                                                   |
|                            | DOC6  | Documents and records relating to waste management is maintained by                                                                  |
|                            | DOC7  | Transportation and storage and of materials need not be specially addressed in                                                       |
| <i>Equipment</i>           | CE1   | Installation of equipment's for recycling in construction site is not mandatory as it does not reduce transportation cost            |
|                            | CE2   | Installation of equipment's for recycling in construction site is not mandatory                                                      |

|                       |      |                                                                                         |
|-----------------------|------|-----------------------------------------------------------------------------------------|
|                       | CE3  | Additional methods need not be informed to site management and workers to treat         |
| <i>Materials</i>      | MAT1 | Prefabricated materials and components do not produce less amount of wastage            |
|                       | MAT2 | Fragile materials need not to be replaced in order to reduce wastage during             |
|                       | MAT3 | Individual containers for sorting out of waste is mandatory in construction site        |
| <i>Work intention</i> | WIM1 | Separate workers should be appointed at the site for disposing waste.                   |
|                       | WIM2 | There is a need of representative of contractor at the site to enforce waste management |

Table 2: Survey response: Level of contribution among waste management influence factors

| Items  | Strongly Disagree |      | Disagree |     | Somewhat Disagree |     | Neutral |     | Somewhat Agree |     | Agree |      | Strongly Agree |      | Total response |     |
|--------|-------------------|------|----------|-----|-------------------|-----|---------|-----|----------------|-----|-------|------|----------------|------|----------------|-----|
|        | N                 | %    | N        | %   | N                 | %   | No      | %   | No             | %   | N     | %    | N              | %    | No             | %   |
| WI 2   | 6                 | 3.9  | 2        | 1.3 | 9                 | 5.9 | 19      | 12. | 26             | 17. | 34    | 22.4 | 56             | 36.8 | 152            | 100 |
| WI 1   | 6                 | 3.9  | 3.       | 2.0 | 9.                | 5.9 | 23.     | 15. | 35.            | 23. | 29    | 19.1 | 47             | 30.9 | 152            | 100 |
| MAT 1  | 56                | 36.8 | 39       | 25. | 24                | 15. | 21      | 13. | 6              | 3.9 | 4     | 2.6  | 2              | 1.3  | 152            | 100 |
| MAT 2  | 35                | 23   | 35       | 23  | 39                | 25. | 20      | 13. | 18             | 11. | 3     | 2    | 2              | 1.3  | 152            | 100 |
| MAT 3  | 56                | 36.8 | 48       | 31. | 21                | 13. | 18      | 11. | 5              | 3.3 | 3     | 2    | 1              | 0.6  | 152            | 100 |
| CMT 10 | -                 | -    | 4        | 2.6 | 6                 | 3.9 | 17      | 11. | 25             | 16. | 37    | 24.3 | 63             | 41.4 | 152            | 100 |
| CMT 11 | -                 | -    | -        | -   | 11                | 7.2 | 22      | 14. | 25             | 16. | 40    | 26.3 | 54             | 35.5 | 152            | 100 |
| CMT 8  | -                 | -    | 4        | 2.6 | 8                 | 5.3 | 19      | 12. | 23             | 15. | 41    | 27   | 57             | 37.5 | 152            | 100 |
| CMT 1  | 3                 | 2    | 3        | 2   | 8                 | 5.3 | 14      | 9.2 | 19             | 12. | 40    | 26.3 | 65             | 42.8 | 152            | 100 |
| CMT 6  | -                 | -    | 1        | 0.6 | 6                 | 3.9 | 14      | 9.2 | 27             | 17. | 25    | 16.4 | 79             | 52   | 152            | 100 |
| CMT 9  | 1                 | 0.6  | 5        | 3.3 | 5                 | 3.3 | 25      | 16. | 24             | 15. | 42    | 26.6 | 50             | 32.9 | 152            | 100 |

|       |    |      |    |     |    |     |    |     |    |     |    |      |    |      |     |     |
|-------|----|------|----|-----|----|-----|----|-----|----|-----|----|------|----|------|-----|-----|
| CMT 2 | -  | -    | 1  | 0.6 | 7  | 4.6 | 22 | 14. | 33 | 21. | 43 | 28.3 | 46 | 30.3 | 152 | 100 |
| CMT 4 | 2  | 1.3  | 1  | 0.7 | 5  | 3.3 | 29 | 19. | 26 | 17. | 35 | 23   | 54 | 35.5 | 152 | 100 |
| CMT 5 | 2  | 1.3  | 4  | 2.6 | 7  | 4.6 | 18 | 11. | 26 | 17. | 40 | 26.3 | 55 | 36.2 | 152 | 100 |
| CMT 7 | 2  | 1.3  | 4  | 2.6 | 2  | 1.3 | 12 | 7.9 | 21 | 13. | 38 | 25   | 73 | 48   | 152 | 100 |
| CMT 3 | -  | -    | 2  | 1.3 | 13 | 8.6 | 13 | 8.6 | 17 | 11. | 45 | 29.6 | 62 | 40.8 | 152 | 100 |
| DOC 7 | 14 | 9.2  | 11 | 7.2 | 20 | 13. | 31 | 20. | 27 | 17. | 21 | 13.8 | 28 | 18.4 | 152 | 100 |
| DOC 1 | 20 | 13.2 | 15 | 9.9 | 24 | 15. | 37 | 24. | 18 | 11. | 23 | 15.1 | 15 | 9.9  | 152 | 100 |
| DOC 3 | 24 | 15.8 | 22 | 14. | 19 | 12. | 33 | 21. | 17 | 11. | 21 | 13.8 | 16 | 10.5 | 152 | 100 |
| DOC 4 | 13 | 8.6  | 15 | 9.9 | 26 | 17. | 30 | 19. | 25 | 16. | 20 | 13.2 | 23 | 15.1 | 152 | 100 |
| DOC 6 | 12 | 7.9  | 16 | 10. | 23 | 15. | 30 | 19. | 20 | 13. | 30 | 19.7 | 21 | 13.8 | 152 | 100 |
| DOC 5 | 42 | 27.6 | 23 | 15. | 13 | 8.6 | 24 | 15. | 18 | 11. | 14 | 9.2  | 18 | 11.8 | 152 | 100 |
| DOC 2 | 35 | 23   | 24 | 15. | 15 | 9.9 | 14 | 9.2 | 17 | 11. | 24 | 15.8 | 23 | 15.1 | 152 | 100 |
| CE 2  | 43 | 28.3 | 33 | 21. | 25 | 16. | 20 | 13. | 12 | 7.9 | 11 | 7.2  | 8  | 5.3  | 152 | 100 |
| CE 1  | 35 | 23   | 36 | 23. | 30 | 19. | 23 | 15. | 13 | 8.6 | 9  | 5.9  | 6  | 3.9  | 152 | 100 |
| CE 3  | 41 | 27   | 39 | 25. | 34 | 22. | 26 | 17. | 5  | 3.3 | 5  | 3.3  | 2  | 1.3  | 152 | 100 |

---

**Respondents Information:**

Email address:

Name:

Age:

Current position:

Educational Background:

Name of the company:

Please rate the following statements on a scale of 1-7

1. Strongly Disagree      2. Disagree      3. Somewhat Disagree      4. Neutral      5. Somewhat Agree  
6. Agree      7. Strongly Agree

Table 3: Questions sent as survey

|                                                                                          |               |
|------------------------------------------------------------------------------------------|---------------|
| There is a need of representative of contractor at the site to enforce waste management. | 1-2-3-4-5-6-7 |
| Separate workers should be appointed at the site for disposing waste.                    | 1-2-3-4-5-6-7 |
| Support from subcontractors is mandatory for implementing waste management.              | 1-2-3-4-5-6-7 |
| There should be a separate work break down structure for waste management.               | 1-2-3-4-5-6-7 |
| Highly qualified engineers are not mandatory for implementing waste management.          | 1-2-3-4-5-6-7 |
| Education of laborers is not mandatory for waste management.                             | 1-2-3-4-5-6-7 |
| Supervisor to worker ratio will not affect the implementation of waste management .      | 1-2-3-4-5-6-7 |
| Collection of material packaging waste by their respective suppliers will reduce wastage | 1-2-3-4-5-6-7 |
| Revamping will not reduce wastage                                                        | 1-2-3-4-5-6-7 |

|                                                                                                           |               |
|-----------------------------------------------------------------------------------------------------------|---------------|
| Usage of good quality materials will not reduce wastage.                                                  | 1-2-3-4-5-6-7 |
| Prefabricated materials and components will produce less amount of wastage                                | 1-2-3-4-5-6-7 |
| Usage of recycled material is not supported by majority of clients.                                       | 1-2-3-4-5-6-7 |
| Fragile materials are to be replaced in order to reduce wastage during construction.                      | 1-2-3-4-5-6-7 |
| Fragile materials are to be handled carefully in order to reduce wastage during construction.             | 1-2-3-4-5-6-7 |
| Transportation and storage and of materials need not be specially addressed in SWMPs.                     | 1-2-3-4-5-6-7 |
| Preparation of excess perishable material before execution should be strictly avoided to prevent wastage. | 1-2-3-4-5-6-7 |
| Excess prepared material enables fewer delays during execution of tasks.                                  | 1-2-3-4-5-6-7 |
| Individual containers for sorting out of waste is mandatory in construction site                          | 1-2-3-4-5-6-7 |
| individual waste from a mixture of wastes should be made a must do option in construction site            | 1-2-3-4-5-6-7 |
| Waste storage sites design need not be included in design documents.                                      | 1-2-3-4-5-6-7 |
| Waste collectors are to be installed at every floor and a jumbo collector for the entire building.        | 1-2-3-4-5-6-7 |
| Wastes are to be placed in an accessible area for easy shipping.                                          | 1-2-3-4-5-6-7 |
| Equip subcontractors with bins for waste collection.                                                      | 1-2-3-4-5-6-7 |

|                                                                                                               |               |
|---------------------------------------------------------------------------------------------------------------|---------------|
| Workers should be given training in identifying recyclable material.                                          | 1-2-3-4-5-6-7 |
| Installation of equipment's for recycling in construction site is mandatory.                                  | 1-2-3-4-5-6-7 |
| A mixture of soil and waste is not taken into consideration                                                   | 1-2-3-4-5-6-7 |
| Installation of equipment's for recycling in construction site is mandatory as it reduces transportation cost | 1-2-3-4-5-6-7 |
| Additional methods have to be informed to site management and workers to treat the materials after recycling. | 1-2-3-4-5-6-7 |
| A Statute on management of waste by the corresponding waste producers is not mandatory.                       | 1-2-3-4-5-6-7 |
| Clauses should be incorporated in contractual documents for subcontractor alone.                              | 1-2-3-4-5-6-7 |
| Awards are mandatory for a contractor who produces less amount of wastage.                                    | 1-2-3-4-5-6-7 |
| Document management is must for tacking and classifying wastes and quantities                                 | 1-2-3-4-5-6-7 |
| Clauses in contract documents specifying waste treatment methodologies and equipment are not mandatory.       | 1-2-3-4-5-6-7 |
| Site waste management plan (SWMP) should be completed before preconstruction phase.                           | 1-2-3-4-5-6-7 |
| Checklists for waste management need to be verified and enforced by subcontractor alone.                      | 1-2-3-4-5-6-7 |
| An index score to define the capability of a firm towards waste management is mandatory.                      | 1-2-3-4-5-6-7 |
| An ranking system to rank firm towards waste management is mandatory.                                         | 1-2-3-4-5-6-7 |

|                                                                                                                                       |               |
|---------------------------------------------------------------------------------------------------------------------------------------|---------------|
| Documents and records relating to waste management is maintained by subcontractor alone                                               | 1-2-3-4-5-6-7 |
| Analyzing alternative route for waste transportation and determining the ideal route is unproductive work                             | 1-2-3-4-5-6-7 |
| Mandatory item of actual Cost for waste treatment to be provided in bill along with satisfactory documentation                        | 1-2-3-4-5-6-7 |
| Enforce strict punishment for illegal disposal of wastes in violation of EPA regulations.                                             | 1-2-3-4-5-6-7 |
| During bidding process additional weightage to be given to contractors having clear plan, schedule and estimates of waste management. | 1-2-3-4-5-6-7 |
| Code provisions for construction waste management are not mandatory.                                                                  | 1-2-3-4-5-6-7 |
| No GST (State and central tax) on waste treatment equipment's.                                                                        | 1-2-3-4-5-6-7 |
| Reduce legal procedures for installation of waste management equipment's.                                                             | 1-2-3-4-5-6-7 |
| Clauses relevant to Quality and safety of recycled material are not necessary to be included in code books.                           | 1-2-3-4-5-6-7 |
| Government should create separate market for recyclable materials.                                                                    | 1-2-3-4-5-6-7 |
